# Supplementary material
Source: PubMed Central journal article supplement (PMC3652420)
Supplement: supp_ddt075_ddt075supp.pdf [file supp_ddt075_ddt075supp.pdf]

**Supplemental Figure 1. In situ hybridization of *Pk1* expression during development.** **A**, Weak and uniform expression of *Pk1* in developing cortex (CCX), anlage of hippocampus (Hip, between short yellow lines) and lateral ganglion eminence (LGE) at E13.5. LV, lateral ventricle. **B**, *Pk1* is weakly expressed in retina (Re), and decently expressed in lens (Le) and a subset of mesenchymal cells in eye region. **C**, Similar to brain cortex, weak and uniform expression of *Pk1* in both ventricular zone (VZ) and differentiating area of the developing spinal cord. *Pk1* expression is also detected in dorsal root ganglion (DRG). **D**, An example of *Pk1* expression in non-neural tissue of tongue muscle (TM) and Meckel's cartilage (MC). **E**, An overview of *Pk1* expression in E15.5 brain coronal section. 3V, third ventricle, LGE, lateral ganglionic eminence. **F**, Enlarged boxed area in **E** showing *Pk1* expression in ventricular, subventricular and intermediate zones, and lateral ganglion eminence (LGE). **G**, *Pk1* expression in P1 hippocampus. DG, dentate gyrus; CA, *Cornu Ammonis*. **H**, *Pk1* expression in P5 hippocampus. **I**, *Pk1* expression in olfactory bulb (OB) and hair follicles (HF) at P5. **J**, *Pk1* expression in P5 retina (Re), lens (Le) and hair follicles (HF). **K-O**, *Pk1* sense probe control in situ hybridization. **K**, E16.5 retina. **L**, P0 retina. **M**, P5 retina. **N**, P21 retina. **O**, P0 hippocampus.

**Supplemental Figure 2. *Pk1* expression in striatum and thalamus revealed by the endogenous EYFP reporter.** **A**. Overlapping of *Pk1* (green) and NeuN (red) labeling in the striatum of the forebrain (note merged red and green channels). **B**. Overlapping of *Pk1* (green) and NeuN (red) labeling in the posterior

thalamus (note merged red and green channels). **C-D**. Section levels of the images: C, for panels in A, striatum (ST); D, for panels in B, thalamus (TH). CCX, cerebral cortex; SC, superior collicullus; HT, hypothalamus; MM, medial mammillary nucleus. Short lines indicate cells that are NeuN positive only.

**Supplemental Figure 3. Validation of *Pk1* shRNAi in HEK293 cells and primary neuronal culture.**

**A.** shRNA efficiently knocks down *Pk1* expression in HEK 293 cells. **a)** Overexpression of *Pk1* in HEK 293 cells detected by anti-Pk1 antibody (red). **b)** shRNA and *Pk1* cotransfected cells greatly reduce Pk1 expression (red). **c)** Cotransfected GFP (green) with Pk1 (red). **d)** Cotransfected GFP, shRNA (green), and Pk1 (IHC red). *Pk1* but not GFP expression is knocked down by shRNA (compared **c)** with **d)**). **B,** GFAP-positive feeder astrocytes in neuronal culture. **C,** Map2/GFAP staining of the same field showing healthy hippocampal neurons on top of the astrocytes. **D,** Zoom-in of hippocampal neurons stained with anti-MAP2 at day 7 (DIV7) culture.

**Supplemental Figure 4. Expression and subcellular localization of Pk1 and its mutant proteins in HEK 293 cells.**

**A,** Graphical illustration of GFP- and myc-tagged full-length (FL) Pk1, and various deletion constructs used in this study. Different deletion constructs are named by an affixed “ $\Delta$ ” to the deleted domains. Color codes indicate domains and tags in each construct. **B-C.** Referring to panel order from top to bottom: localization of Pk1 full-length (Pk1-

FL) in the nuclear envelope and membrane protrusions in the nucleus (white arrows); deletion of PET (DeltaPET), LIM (DeltaLIM), CIIS (DeltaCIIS), and both LIM and CIIS (DeltaLIM/CIIS) cause vesicle-like localization of Pk1 on nuclear membrane (yellow arrows); deletion of PET and CIIS (DeltaPET/CIIS) causes nuclear localization of Pk1 (green arrows); while deletion of PET and LIM (DeltaPET/LIM) causes complete cytoplasmic localization. Deletion of PET, LIM and CIIS (DeltaPET/ LIM/CIIS) altogether cause similar phenotypes as deletion of PET and LIM. **D**, Differential localization of Pk1 deletion construct compared with GFP-tagged full-length Pk1 within the same cell. Myc-tagged DeltaPET/CIIS localizes solely in the nucleus (red and yellow), while GFP-tagged full-length Pk1 localizes on the both nuclear envelope and nucleus (green and yellow). **E**, Differential localization of DeltaPET/LIM/CIIS compared with GFP-tagged full-length Pk1. With PET, LIM and CIIS deletion, Pk1 protein mostly localizes in the cytoplasm (red, encircled by dashed lines), while GFP-tagged Pk1 remains in the nucleus (green, arrow).

**Supplemental Figure 5. Expression of Pk1 during retinal development and its downregulation in *Nrl*<sup>-/-</sup> retina. A.** qPCR detection of *Pk1* expression at different developmental stages in both wild-type (green bars) and *Nrl*<sup>-/-</sup> (blue bars) retinas. All stages of *Pk1* expression are normalized to embryonic day 14 (E14). Dashed line indicates basal level expression at E14 (arbitrarily defined as 1). A decreased expression of *Pk1* in *Nrl*<sup>-/-</sup> retina is consistently observed (blue

bars). **B.** Western blot using Pk1 specific antibody shows reduced protein expression in 4-week old *Nrl*<sup>-/-</sup> retina. **C.** eYFP reporter revealed widely-expressing *Pk1* by retinal neurons including ONL cells at P21. **D-F,** Expression of Pk1 (green) in cones (red) identified by co-labeling of GFP with cone arrestin (CAR) (above short lines).

**Supplemental Figure 6. Normal rhodopsin trafficking in shRNA-transfected photoreceptors. A-C.** Relative normal rhodopsin expression and localization in shRNA-transfected photoreceptors at both P8 and P21. Arrowheads point to rhodopsin. **D-E,** Some shRNA photoreceptors develop outer segment (arrowhead in E). Red is Rds immunostaining.

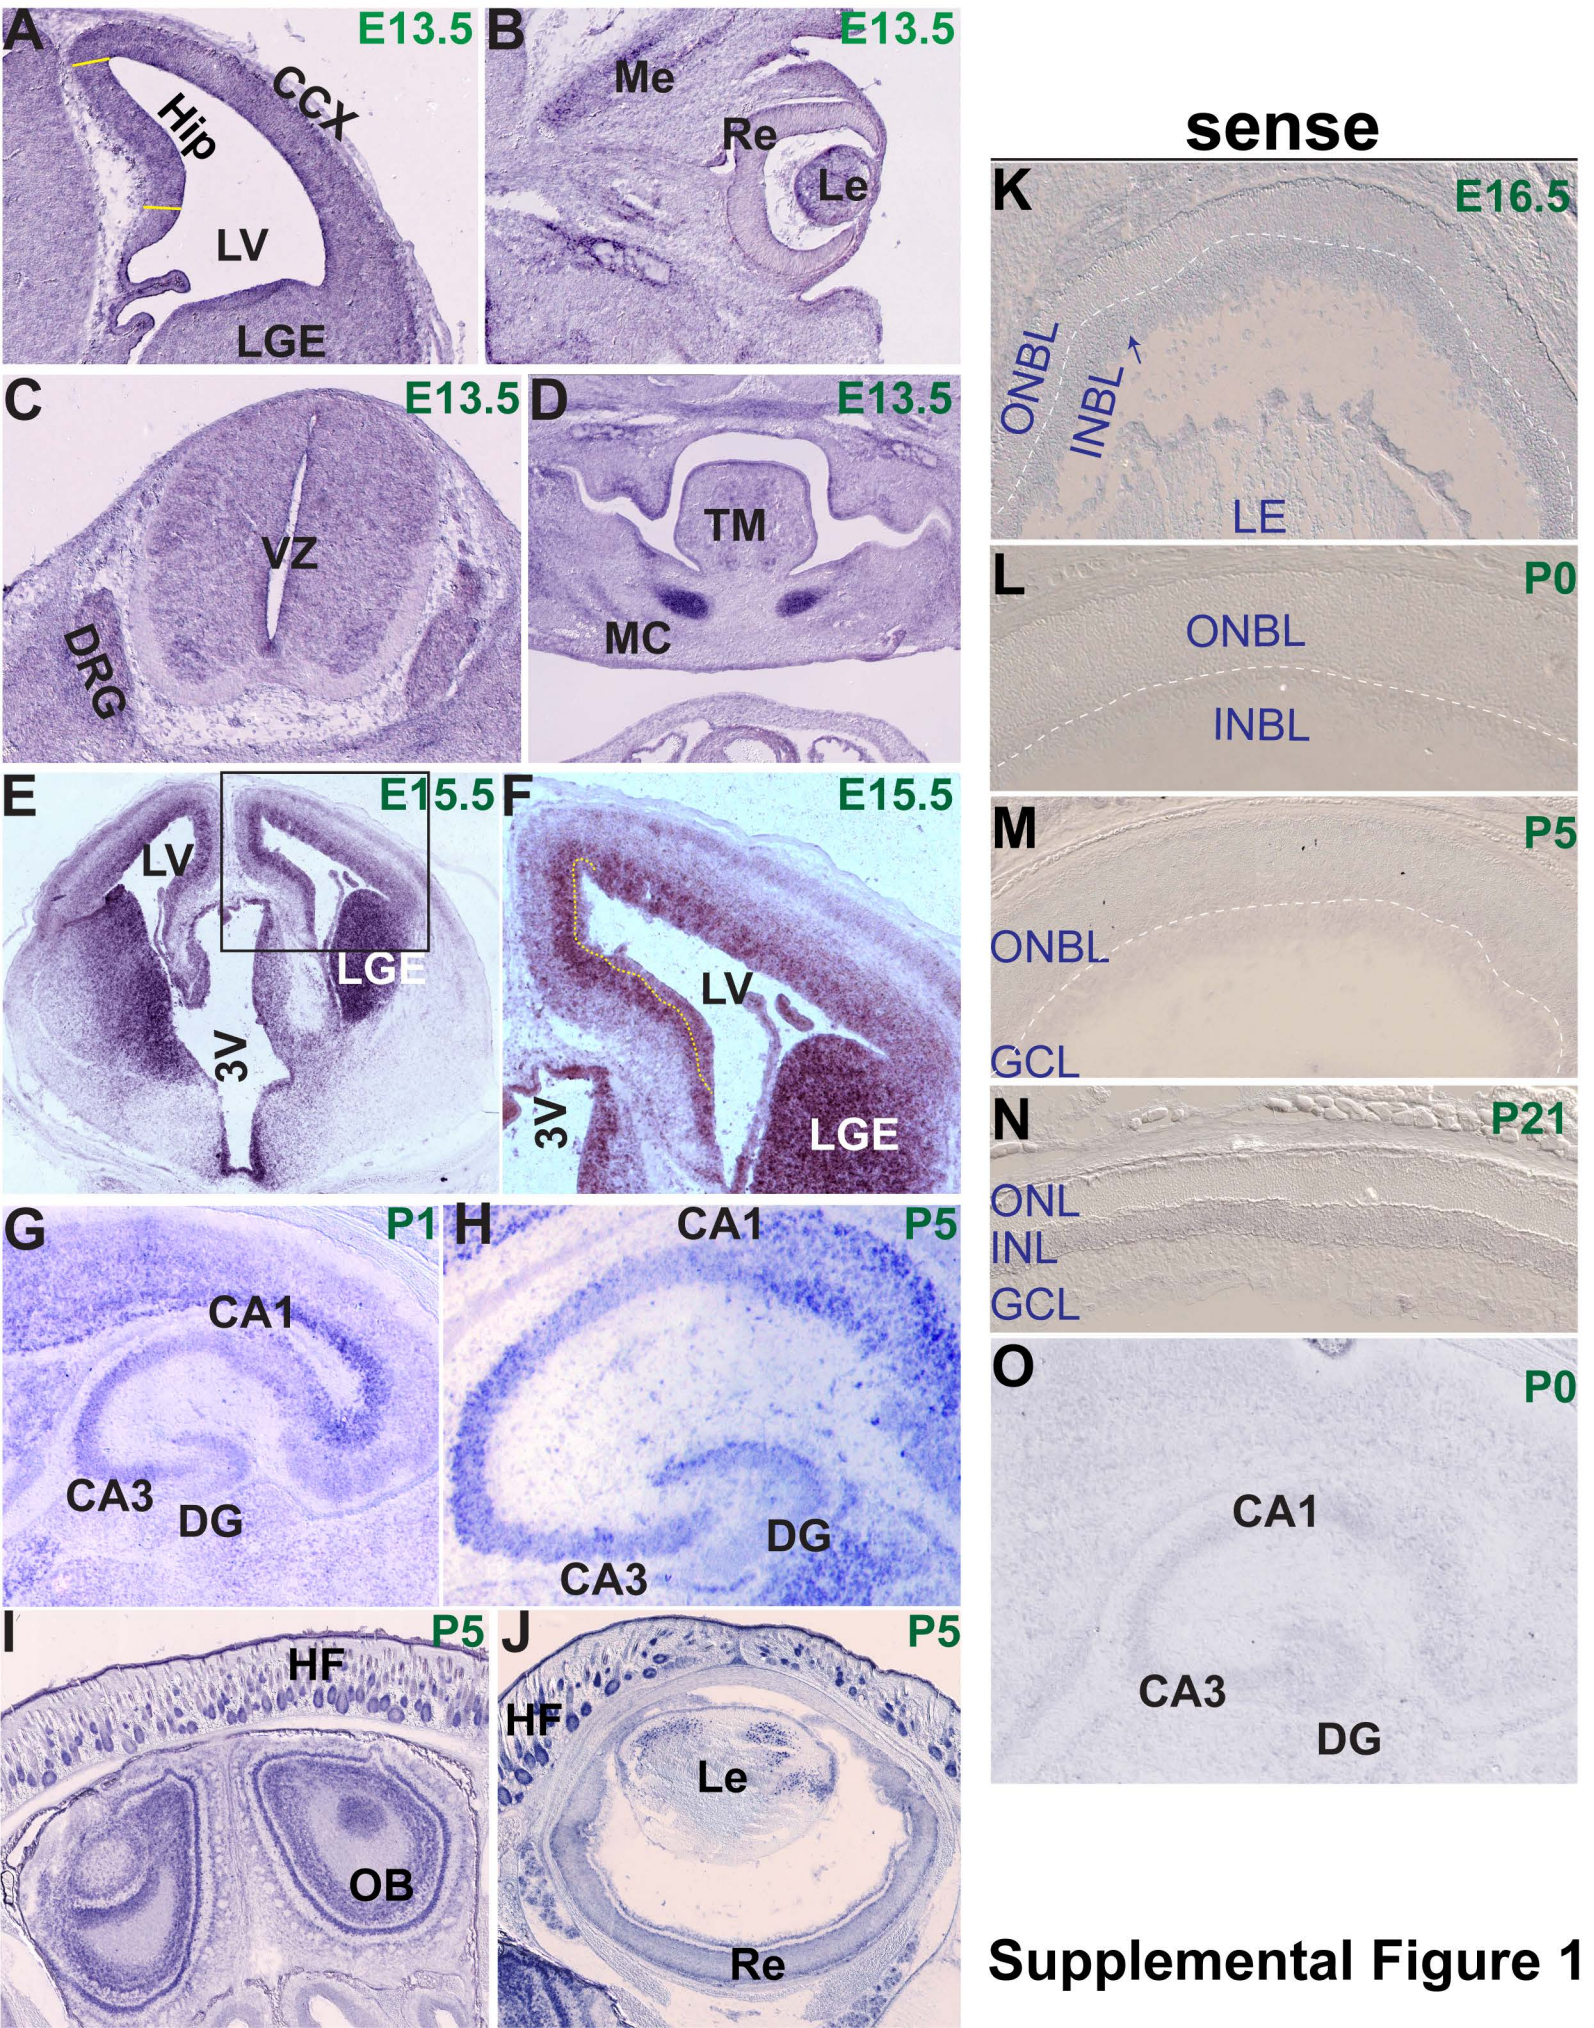

Supplemental Figure 1

# Striatum (ST)

EYFP/NeuN

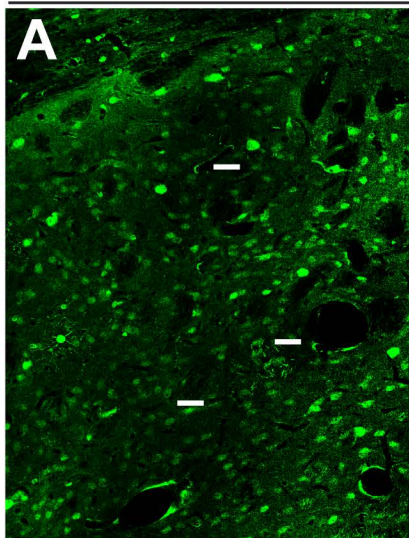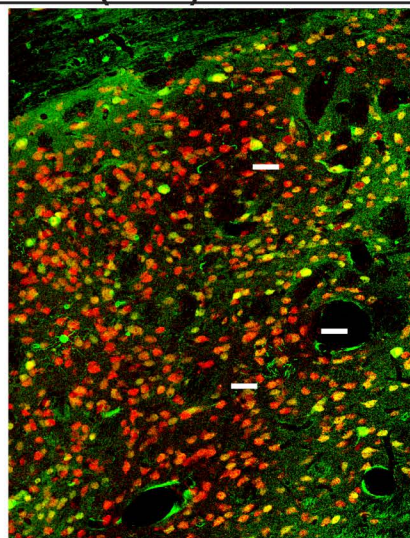

# Thalamus (TH)

EYFP/NeuN

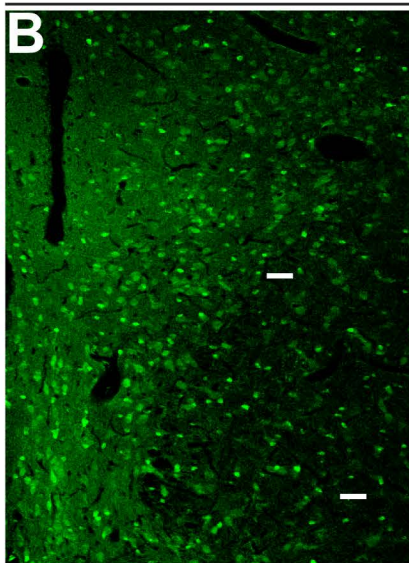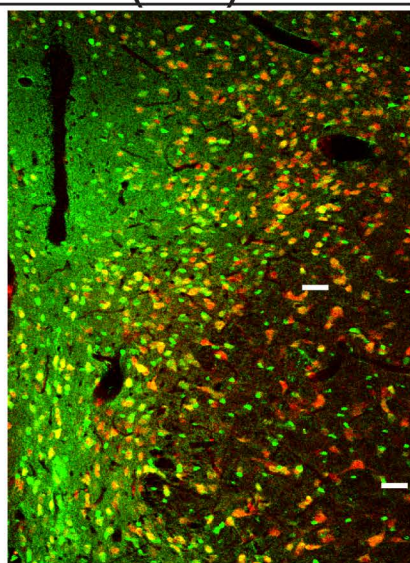

**C**

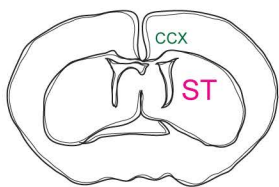

**D**

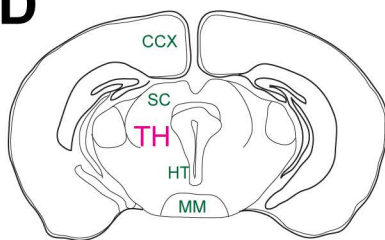

Supplemental Figure 2

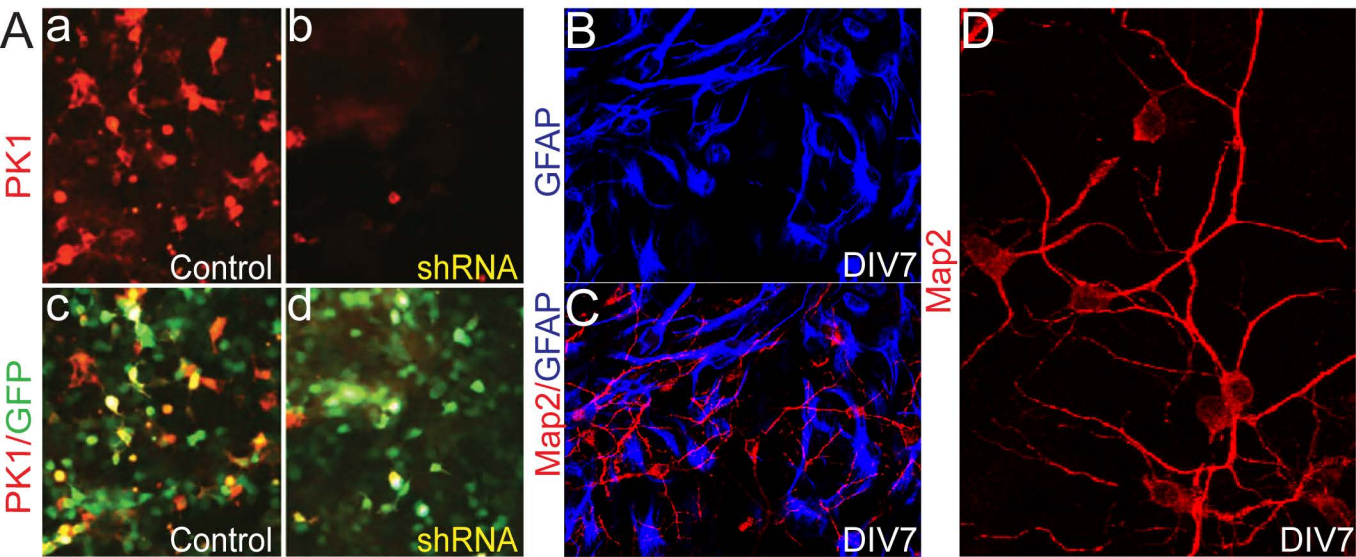

**Supplemental Figure 3**

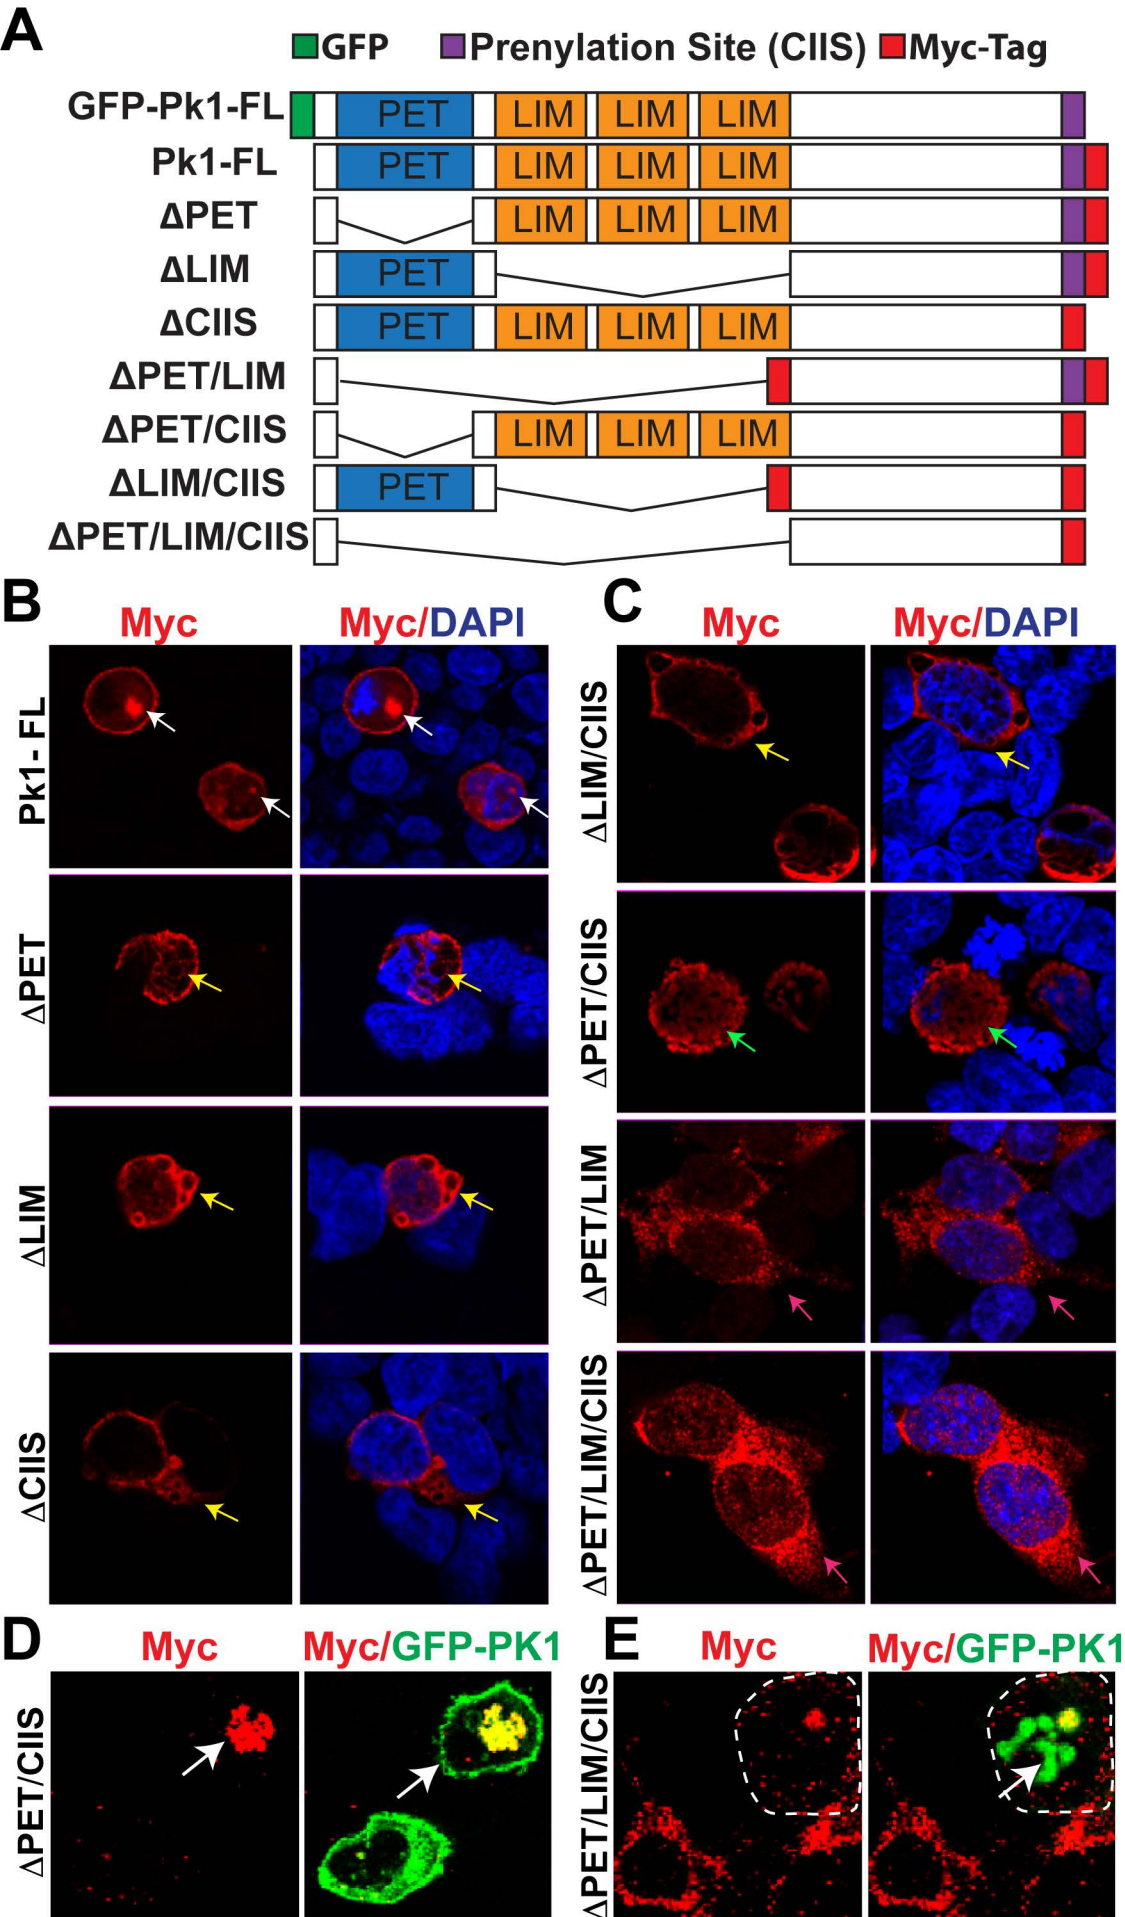

Supplemental Figure 4



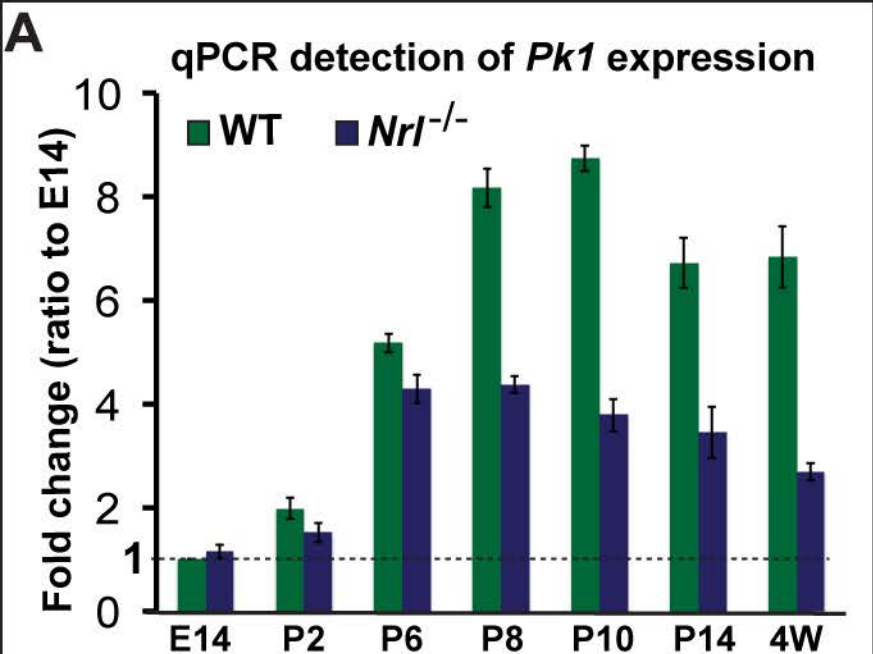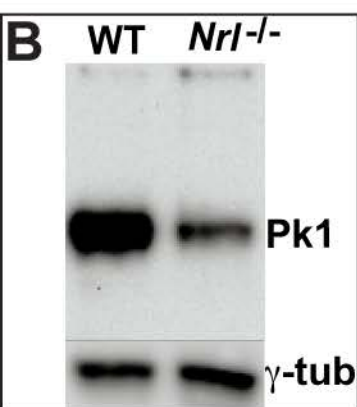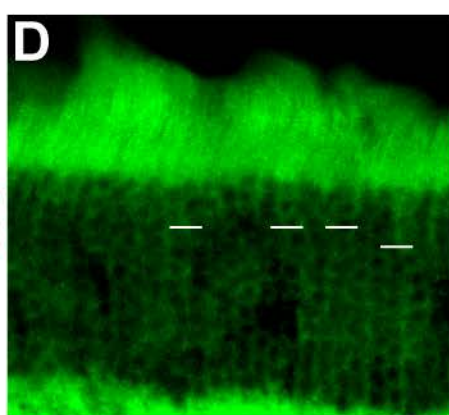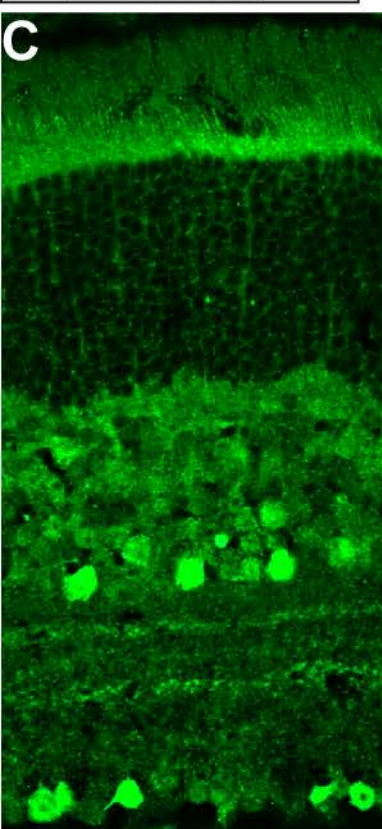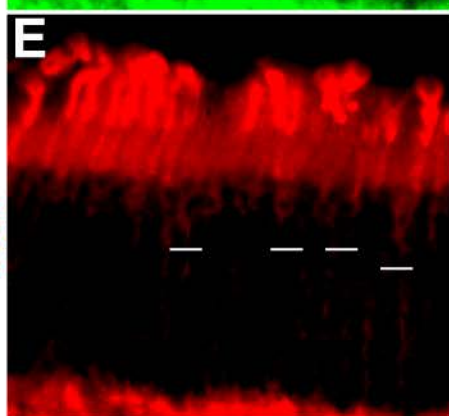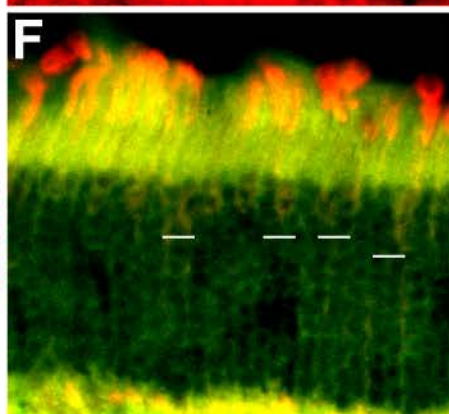

Suppelemental Figure5

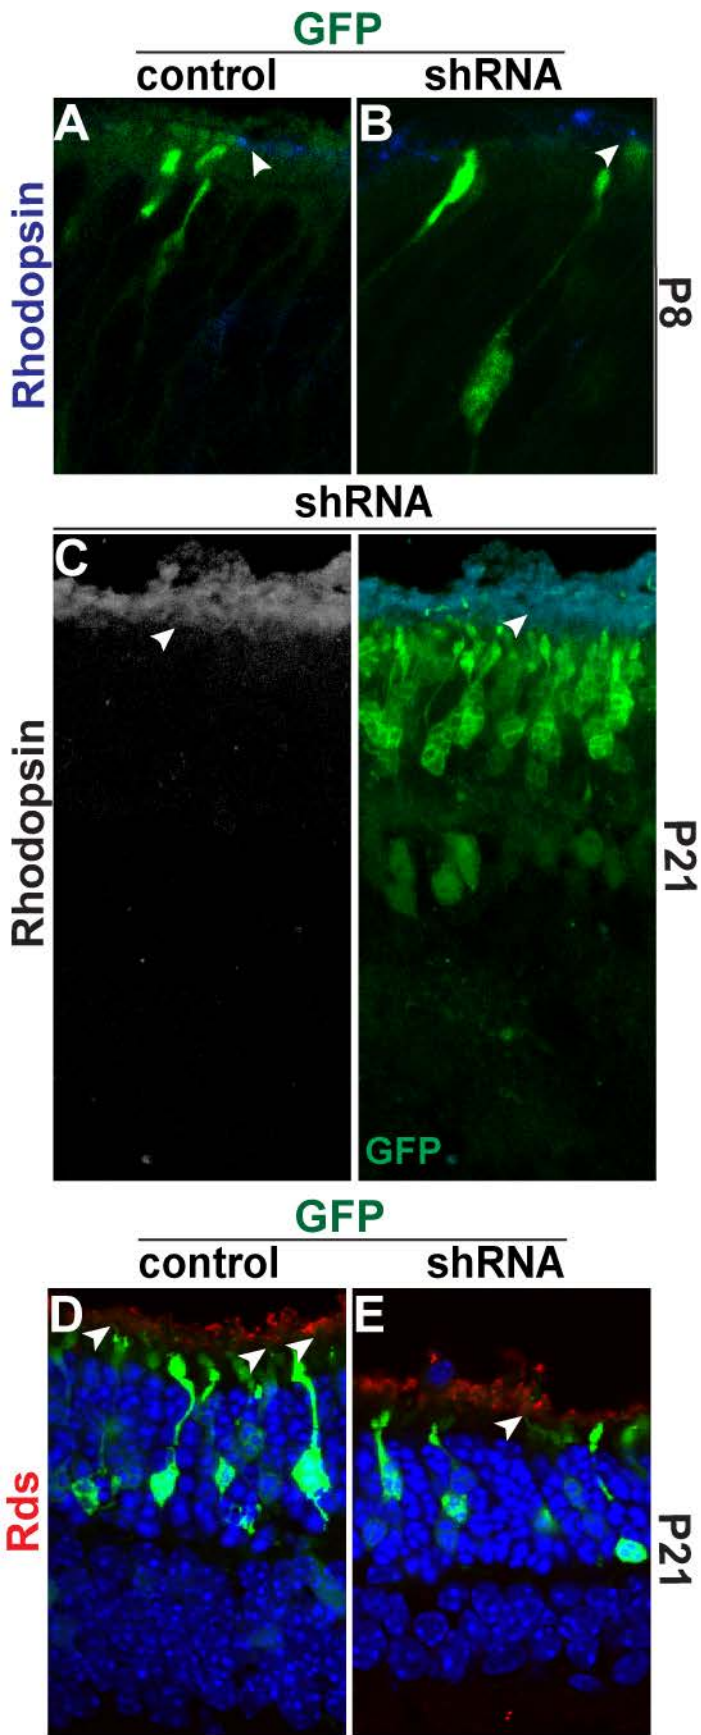

**Supplemental Figure 6**

**Supplemental table 1. Quantification of dendrites in cultured hippocampal neurons**

| Constucts     | Primary dendrites             | average | P positive aberrant neuronal morpholog |    | Aberrant percentage |
|---------------|-------------------------------|---------|----------------------------------------|----|---------------------|
| Control GFP   | 3+2+5+4+4+3+5+3+2+3+3+3 +5 +4 | 3.5     | 16                                     | 2  | 12.5                |
| ShRNA         | 3+4+5+3+4+3+5+4+3             | 3.7     | 12                                     | 9  | 75                  |
| dPet          | 3+4+5+4+4+4+3+3               | 3.75    | 11                                     | 8  | 72.72727273         |
| dPet/Lim      | 3+4+5+4+4+3+5+4+3             | 3.89    | 14                                     | 9  | 78.57142857         |
| dLim/CIIS     | 3+4+5+5+4+3+5+3+3+3+3         | 3.72    | 14                                     | 11 | 85.71428571         |
| dPet/lim/CIIS | 3+5+5+4+5+3+5+4+3             | 4.11    | 11                                     | 9  | 81.81818182         |

| Dendritic density: Crossing points/50um-diameter circle |                | average    | STDEV       | total neurons analysed |
|---------------------------------------------------------|----------------|------------|-------------|------------------------|
| Control GFP                                             | 2+3+4+2+3+4+4  | 3.14285714 | 0.899735411 | 7                      |
| ShRNA                                                   | 10 +12+9+7+6+7 | 8.5        | 2.258317958 | 6                      |
| dPet                                                    | 6+8+6+5+7+5    | 6.16666667 | 1.169045194 | 6                      |
| dPet/Lim                                                | 5+5+6+4+5+7    | 5.33333333 | 1.032795559 | 6                      |
| dLim/CIIS                                               | 7+6+5+6+7+8    | 6.5        | 1.048808848 | 6                      |
| dPet/lim/CIIS                                           | 4+3+5+4+3+5+5  | 4.14285714 | 0.899735411 | 7                      |

**Dendritic crossing points**

| GFP construct        | shRNA                    | dPet        | dPet/Lim                              | dPet/CIIS                    | dPet/lim/ciis                    |
|----------------------|--------------------------|-------------|---------------------------------------|------------------------------|----------------------------------|
| 2                    | 10                       | 6           | 5                                     | 7                            | 4                                |
| 3                    | 12                       | 8           | 5                                     | 6                            | 3                                |
| 4                    | 9                        | 6           | 6                                     | 5                            | 5                                |
| 2                    | 7                        | 7           | 4                                     | 6                            | 4                                |
| 3                    | 6                        | 5           | 5                                     | 7                            | 3                                |
| 4                    | 7                        | 5           | 7                                     | 8                            | 5                                |
| 4                    |                          |             |                                       |                              | 5                                |
| <b>TTest P value</b> | 5.99674E-05<br>gfp-shRNA | 0.000263446 | 0.0017876<br>gfp-dpet<br>gfp-dpet/lim | 6.54162E-05<br>gfp/dpet/ciis | 0.059695853<br>gpf-dpet/lim/CIIS |

Supplemental table 2. Quantification of photoreceptor axon terminals and inner/outer segment length (IS+OS) using transrected GFP.

| No. of PRs     | P9 control  |                 | No. of PRs | P14 control |                  | No. of PRs     | P21 control |                 |
|----------------|-------------|-----------------|------------|-------------|------------------|----------------|-------------|-----------------|
|                | IS + OS     | P9 shRNA IS +OS |            | IS +OS      | P14 shRNA IS +OS |                | IS+OS       | P21 shRNA IS+OS |
| 1              | 107.935     | 103.325         | 1          | 102.821     | 102.325          | 1              | 64.195      | 31.953          |
| 2              | 106.283     | 75.18           | 2          | 101.213     | 77.19            | 2              | 111.288     | 66.038          |
| 3              | 120.167     | 100.319         | 3          | 88.906      | 89.319           | 3              | 90.449      | 73.027          |
| 4              | 113.719     | 132.85          | 4          | 93.42       | 121.85           | 4              | 136.015     | 49.497          |
| 5              | 102.181     | 67.268          | 5          | 85.321      | 77.264           | 5              | 128.81      | 48.508          |
| 6              | 93.68       | 106.231         | 6          | 93.683      | 98.233           | 6              | 83.726      | 50.16           |
| 7              | 63.953      | 110             | 7          | 62.923      | 80.06            | 7              | 105.043     | 70.859          |
| 8              | 69.462      | 85.147          | 8          | 70.461      | 85.142           | 8              | 104.01      | 61.685          |
| 9              | 109.11      | 98.082          | 9          | 105.12      | 88.08            | 9              | 106.892     | 76.792          |
| 10             | 96.84       | 89.538          | 10         | 93.84       | 77.438           | 10             | 128.876     | 69.065          |
| 11             | 117.047     | 84.172          | 11         | 112.044     | 64.162           | 11             | 132.197     | 70.859          |
| 12             | 98.351      | 75.472          | 12         | 88.353      | 75.481           | 12             | 109.005     | 41.195          |
| 13             | 95.336      | 73.11           | 13         | 95.345      | 76.15            | 13             | 114.018     | 76.007          |
| 14             | 118.106     | 75.213          | 14         | 98.762      | 75.211           | 14             | 102.489     | 62              |
| 15             | 107.154     | 32.202          | 15         | 107.131     | 33.205           | 15             | 94.048      | 47.802          |
| 16             | 65.299      | 36.139          | 16         | 80.23       | 38.138           | 16             | 68.029      | 44.911          |
| 17             | 89.961      | 55.082          | 17         | 89.554      | 56.082           | 17             | 82.152      | 57.079          |
| 18             | 106.452     | 81.056          | 18         | 103.451     | 79.056           | 18             | 109.659     | 67.03           |
| 19             | 98.433      | 38.601          | 19         | 98.435      | 68.601           | 19             | 121.202     | 42.059          |
| 20             | 122.381     | 67.03           | 20         | 112.361     | 57.031           | 20             | 89.56       | 32.14           |
| 21             | 119.549     | 73.763          | 21         | 119.538     | 73.773           | 21             | 95.352      | 37.108          |
| 22             | 104.547     | 63.6            | 22         | 101.547     | 63.63            | 22             | 91.022      | 44.553          |
| 23             | 87.92       | 94.202          | 23         | 87.927      | 84.202           | 23             | 93.086      | 51.039          |
| 24             | 71.176      | 77.026          | 24         | 70.177      | 56.026           | 24             | 92          | 52.612          |
| 25             | 102.528     | 59.54           | 25         | 98.528      | 79.55            | 25             | 94.133      | 75.107          |
| 26             | 123.033     | 70.711          | 26         | 100.035     | 77.712           | 26             | 87.207      | 65.97           |
| 27             | 136.125     | 38.079          | 27         | 126.135     | 58.089           | 27             | 98.858      | 49              |
| 28             | 108.301     | 94.366          | 28         | 109.443     | 64.213           | 28             | 94.048      | 41.11           |
| 29             | 113.146     | 56.569          | 29         | 103.156     |                  | 29             | 56.515      | 39.294          |
| 30             | 103.817     | 67.119          | 30         | 105.673     |                  | 30             | 64.07       |                 |
| 31             | 113.296     | 50.488          | 31         | 115.297     |                  | 31             | 94.133      |                 |
| <b>Average</b> | 102.7512258 | 75.20903226     |            | 97.44612903 | 74.1861786       | <b>Average</b> | 98.13183871 | 54.9813448      |
| <b>STDEV</b>   | 17.35026299 | 23.55851132     |            | 14.17992486 | 18.2086567       | <b>STDEV</b>   | 19.7659235  | 13.911328       |
| <b>P value</b> | 1.0865E-06  |                 |            | 9.24027E-07 |                  | <b>P value</b> | 8.91575E-14 |                 |

  

| No. of sections | P9 control                |             | No. of sections | P9 shRNA                 |             |
|-----------------|---------------------------|-------------|-----------------|--------------------------|-------------|
|                 | Axon terminals/cells x100 |             |                 | Axon terminals/cellsx100 |             |
| 1               | 0.52                      | 52          | 1               | 0.342857143              | 34.28571429 |
| 2               | 0.5111111111              | 51.11111111 | 2               | 0.375                    | 37.5        |
| 3               | 0.588235294               | 58.82352941 | 3               | 0.3111111111             | 31.11111111 |
| <b>Average</b>  | 0.342989418               | 34.2989418  | <b>Average</b>  | 0.342989418              | 34.2989418  |
| <b>STDEV</b>    | 0.042196381               | 4.21963808  | <b>STDEV</b>    | 0.03194465               | 3.194464984 |
| <b>P value</b>  | 0.001495206               |             |                 |                          |             |

  

| No. of sections | P14 control               |             | No. of sections | P14 shRNA                |             |
|-----------------|---------------------------|-------------|-----------------|--------------------------|-------------|
|                 | Axon terminals/cells x100 |             |                 | Axon terminals/cellsx100 |             |
| 1               | 0.46                      | 46          | 1               | 0.416666667              | 41.6666667  |
| 2               | 0.511627907               | 51.1627907  | 2               | 0.333333333              | 33.3333333  |
| 3               | 0.55                      | 55          | 3               | 0.369565217              | 36.95652174 |
| <b>Average</b>  | 0.373188406               | 50.72093023 | <b>Average</b>  | 0.373188406              | 37.31884058 |
| <b>STDEV</b>    | 0.045162407               | 4.516240749 | <b>STDEV</b>    | 0.041784647              | 4.178464708 |
| <b>P value</b>  | 0.009778386               |             |                 |                          |             |

  

| No. of sections | P21 control                |             | No. of sections | P21 shRNA                 |    |
|-----------------|----------------------------|-------------|-----------------|---------------------------|----|
|                 | axon terminals/cell nox100 |             |                 | axon terminal/cell number |    |
| 1               | 0.416666667                | 41.6666667  | 1               | 0.25                      | 25 |
| 2               | 0.470588235                | 47.0588235  | 2               | 0.26                      | 26 |
| 3               | 0.518518519                | 51.8518519  | 3               | 0.24                      | 24 |
| <b>Average</b>  | 0.46859114                 | 46.85911402 | <b>Average</b>  | 0.25                      | 25 |
| <b>STDEV</b>    | 0.05095287                 | 5.09528657  | <b>STDEV</b>    | 0.01                      | 1  |
| <b>P value</b>  | 0.001880918                |             |                 |                           |    |

  

| shRNA                |             | Control              |             |
|----------------------|-------------|----------------------|-------------|
| <b>P: P9 vs P14</b>  | 0.376279256 | <b>P: P9 vs P14</b>  | 0.412988742 |
| <b>P: P14 vs P21</b> | 0.00767247  | <b>P: P14 vs P21</b> | 0.381535384 |
| <b>P: P9 vs P14</b>  | 0.00857487  | <b>P: P9 vs P14</b>  | 0.135802261 |
